# Supplementary material
Source: publisher figshare collection journal article supplement (https://acs.figshare.com/ndownloader/files/4260889)
Supplement: Supplementary file 1 [file 4260889]

## Supporting Information

### Composite Fuel Cell Membranes from Dual-Nanofiber Electrospun Mats

*Jason B. Ballengee and Peter N. Pintauro\**

Department of Chemical and Biomolecular Engineering, Vanderbilt University, 2400  
Highland Avenue, Nashville, TN 37212, USA

\*Author for all correspondence: peter.pintauro@vanderbilt.edu

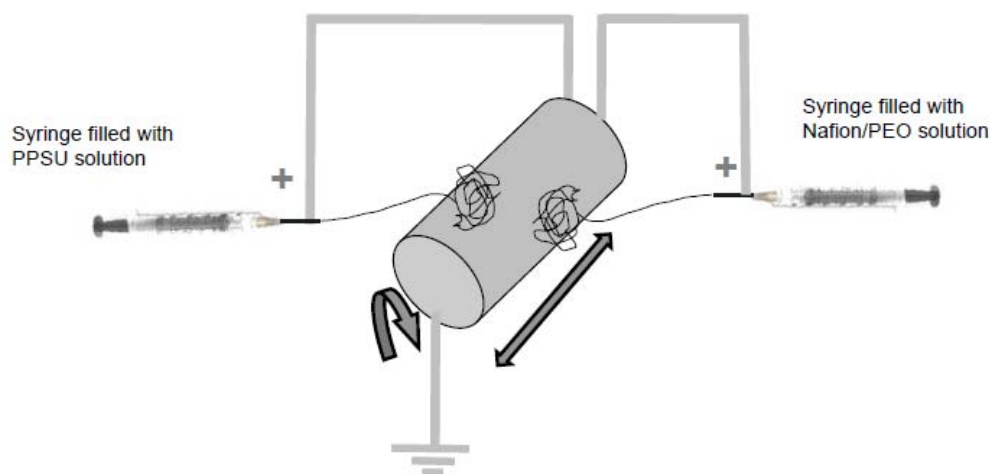

**Figure S1.** Schematic of dual-fiber electrospinning experiment. The collecting drum rotates and oscillates horizontally for random orientation and uniform distribution of the nanofibers.

**Table S1.** Limiting current measurements from accelerated lifetime testing.

| Time (hours) | Limiting Current - Nafion 212 (mA/cm <sup>2</sup> ) | Limiting Current - Nanofiber Composite (mA/cm <sup>2</sup> ) |
|--------------|-----------------------------------------------------|--------------------------------------------------------------|
| 0            | 1.5                                                 | 1.9                                                          |
| 515          | >13                                                 | 5.2                                                          |
| 845          | n/a                                                 | >13                                                          |
